# Supplementary material
Source: Research Square preprint supplement (doi:10.21203/rs.3.rs-9829345/v1)
Supplement: Supplementary file 1 [file 35d41011c94ba7a4967cc204.xlsx]

## Sheet: List1
Table 2. Strontium–neodymium isotopic composition of test archaeological samples
Sample	87Sr/86Sr	2S(M)	142Nd/144Nd	2S(M)	εNd0	2SE
122_middle	0.714820	0.000013	0.512137	0.000036	-9.8	0.7
122_middle repl.			0.512165	0.000061	-9.2	1.2
122_outer	0.714135	0.000013
122_outer	0.714785	0.000010	0.5120945	0.000175	-10.6	3.4
122_inner	0.715344	0.000013	0.512140	0.000161	-9.7	3.1
142_middle	0.720373	0.000009	0.512207	0.000094	-8.4	1.84
142_middle repl.	0.720354	0.000010
142_outer	0.720298	0.000009
142_inner	0.719746	0.000012
220_middle	0.711921	0.000012	0.512149	0.000164	-9.5	3.2
220_outer	0.711696	0.000017
220_inner	0.712080	0.000016
Reference materials
NIST NBS 987	0.710259	0.000014
NIST NBS 987	0.710259	0.000013
JNdi-1			0.512100	0.000007	-10.5	0.13
BCR-2	0.705015	0.000008	0.512627	0.000008	-0.21	0.15
BCR-2			0.512624	0.000008	-0.27	0.16
RGM-2			0.512781	0.000010	2.79	0.19
