# Supplementary material
Source: Research Square preprint supplement (doi:10.21203/rs.3.rs-9829345/v1)
Supplement: Supplementary file 2 [file 58eb9e6671d508ce0f8703db.xlsx]

## Sheet: List1
Table 1. Major and trace element composition of ancient pottery from Přerov-Předmostí.
Lab N	SiO2	TiO2	Al2O3	Fe2O3	MnO	MgO	CaO	K2O	Na2O	P2O5	S	Sum
	wt.%	wt.%	wt.%	wt.%	wt.%	wt.%	wt.%	wt.%	wt.%	wt.%	wt.%	wt.%
5374	66.2	0.71	15.5	5.4	0.05	1.25	1.25	2.49	1.12	1.72	0.03	95.72
5376	59.3	0.89	17.1	7.2	0.08	1.63	2.16	2.55	0.40	1.29	0.03	92.63
5377	43.7	0.78	14.1	5.4	0.09	2.26	10.7	2.34	0.43	4.31	0.03	84.12
5378	58.7	0.80	17.0	7.1	0.13	1.59	1.68	2.36	0.94	1.78	0.03	92.11
5379	60.5	0.86	17.5	7.4	0.20	1.70	1.90	2.65	0.55	1.20	0.03	94.49
5380	59.7	0.76	16.8	6.7	0.12	1.73	3.0	2.77	0.62	0.65	0.03	92.88
5381	70.6	0.83	13.7	4.0	0.02	0.90	1.06	2.01	0.71	1.24	0.03	95.10
5382	63.4	0.78	15.9	6.5	0.13	1.29	1.62	2.32	0.98	1.24	0.03	94.19
	As	Ba	Bi	Cd	Ce	Co	Cr	Cu	Ga	Ge	La	Mo	Nb
	ppm	ppm	ppm	ppm	ppm	ppm	ppm	ppm	ppm	ppm	ppm	ppm	ppm
5374	16	948	0.4	1.6	65	14.4	97	19	19	4	37	1.3	14
5376	22	1415	0.4	2.1	73	17.0	126	56	21	4	41	10	16
5377	11	2085	<b.d.	3.4	58	13.4	135	30	16	3	31	0.9	14
5378	21	906	1.3	1.8	69	12.4	102	36	18	3	45	1.6	15
5379	11	1421	<b.d.	2.1	69	17.0	127	37	22	4	38	1.6	15
5380	17	909	<b.d.	2.0	72	14.0	114	28	19	4	40	1.2	14
5381	9	761	0.41	1.0	66	6.2	100	21	14	3	33	0.8	15
5382	14	1125	<b.d.	1.8	73	12.0	99	34	18	3	40	1.6	15
b.d.	3	5	3	5	4	2	3	2	2	5	4	2	3
a.c.	100	2000	200	50	200	200	500	500	500	5000	200	200	200
	Nd	Ni	Pb	Rb	Sc	Sn	Sr	Th	U	V	W	Y	Zn	Zr
	ppm	ppm	ppm	ppm	ppm	ppm	ppm	ppm	ppm	ppm	ppm	ppm	ppm	ppm
5374	43.1751	36.8274	26.9163	111.794	13.7214	3.4	174	10,8	2,5	95	<b.d.	31.3931	87.0595	152.612
5376	37.4848	78.8949	28.1024	135.675	17.8811	2.7	225	12,4	3,7	199	0.331656	31.7067	144.867	205.078
5377	41.2189	57.9415	21.3275	101.393	15.0176	4.6	481	11,3	2,6	119	<b.d.	25.3769	124.238	144.451
5378	48.9059	68.4323	27.9859	114.735	17.1309	3.1	167	10,7	1,9	109	<b.d.	38.504	113.485	154.186
5379	37.1696	64.5873	27.2467	140.825	18.158	5.0	220	13	3,2	135	1.1363	28.0817	114.045	192.894
5380	40.5501	59.1797	25.3752	125.35	16.038	3.5	131	12,5	2,3	123	<b.d.	34.6644	103.575	194.587
5381	31.7994	60.9866	18.9262	83.1144	12.4153	1.3	107	11,6	3,2	77	1.04091	28.3296	63.4639	385.409
5382	36.5116	57.797	25.803	107.18	14.2216	2.8	172	12,1	2,6	98	1.32548	28.4257	119.38	214.11
b.d.	4	2	3	3	3	3	5	2	2	5	5	3	2	5
a.c.	200	500	200	10000	50	3000	2500	100	100	1500	1000	200	2000	2000
b.d. – below detection limit (BDL)
a.c. – above calibration range (ACR)
