# Supplementary material
Source: Research Square preprint supplement (doi:10.21203/rs.3.rs-9829345/v1)
Supplement: Supplementary file 3 [file 78a405924d48a1dfceedc353.xlsx]

## Sheet: Raw data
Sample	mineral	SiO2	TiO2	Al2O3	Fe2O3	MnO	MgO	CaO	Na2O	K2O	P2O5	Total	Ba	S	Y	Zr	Nb	La	Ce	Pr	Nd	Sm	Gd	Hf	Th	U	0
122	matrix 1	48.27	0.43	21.08	7.28	0.12	2.36	4.02	0.2	1.5	1.38	86.63															0
122	matrix 2	60.19	0.59	16.13	4.23		1.29	2.23	0.19	1.08	0.72	86.64															0
122	ms1	46.53	0.43	36.7	1.46		0.75		0.59	10.05		96.52															0
122	ms2	50		34.44	1.63		1.3	0.64	0.14	8.53		96.68															0
122	Kfs1	64.72		19					0.55	16.66		100.92															0
122	Kfs2	64.16		19.2					0.66	16.32		100.34															0
122	grt1	38.8		22.89	24.84	0.35	11.48	1.01				99.38															0
122	ap1	0.12		0.07	0.27			53.98			41.49	95.93															0
122	zrn1	32.1			0.74											62.42								1.21			0
122	mnz1	0.28						0.94			29.12				3.64			13.46	28.02	3.05	12.05	2.49	1.8		4.06	0.6	0
122	ap2	0.22		0.12				54.13			41.33	95.79															0
142	qz1	99.69										99.69															0
142	bt1	33.91	2.16	18.33	22.94	0.32	10.12	0.8	0.3	2.83		91.7															0
142	bt2	35.03	3.66	15.33	18.44	0.26	8.14	1.21	0.14	4.03		86.25															0
142	Kfs1	63.59		19					0.64	16.07		99.3															0
142	Kfs2	63.87		19.25					0.63	16.26		100.01	0.32														0
142	ms1	45.34	0.46	35.75	1.23		0.84		0.37	10.72		94.71															0
142	ms2	49.62	0.45	34.78	2.19		1.73		0.61	10.15		99.53															0
142	matrix 1	44.55	0.45	23.7	5.34		1.56	1.28	0.27	3.13		80.26															0
142	matrix 2	41.87	0.34	20.98	13.7		1.78	1.63	0.3	1.86	0.28	82.75															0
142	Kfs3	64.66		18.85					0.2	17.07		100.78															0
220	qz1	99.55										99.55															0
220	Kfs1	64.38		18.97	0.21				0.16	17.25		100.96															0
220	bt1	30.95	2.07	18.55	27.43	0.28	3.54	1.15	0.19	8.01	1.87	94.04															0
220	Kfs2	64		19.37	0.23				1.23	15.33		100.51	0.36														0
220	Kfs3	64.25		19.03	0.2				0.11	16.98		100.58															0
220	ms1	47.51	0.39	32.23	2.65		1.69		0.53	10.33		95.33															0
220	ms2	47.59	0.36	32.29	2.43		1.82		0.33	9.88	0.27	94.97															0
220	amp1	41.18	0.63	13.72	20.09	0.42	6.55	11.51	1.09	1.36		96.54															0
220	rt1	0.27	96.25	0.2	0.99			0.19		0.07		99.14					1.17										0
220	ap1	0.19		0.08	0.28	0.16		53.68			40.6	94.99															0
220	ilm1	0.1	46.6	0.14	48.33	1.76	0.33	0.1				97.37															0
220	ap2	0.2		0	0.19			54.48			41.73	96.61															0
220	amp2	51.52	0.26	4.51	12.48	0.21	14.87	11.93	0.54	0.08		96.42															0
220	zrn1	26.77			0.23											52.13								1.33			0
220	zrn2	32.13			0.45											63.04								1.41			0
220	matrix 1	18.51	0.66	16.49	4.73		1.06	5.36		1.13	10.01	58.32	0.38														0
220	matrix 2	18.67	0.27	14.47	3.98		0.8	4.27	0.28	1.07	8.21	52.28	0.27														0
220	matrix 3	21.89	0.44	14.07	4.37		0.67	7.43		1.25	10.21	60.78	0.24	0.2													0
220	matrix 4	19.21	0.7	9	2.96		0.59	2.27		1.58	4.03	40.54	0.19														0
