# Supplementary material
Source: Research Square preprint supplement (doi:10.21203/rs.3.rs-9829345/v1)
Supplement: Supplementary file 4 [file b8ed1f68acf6c31bf00ace4d.xlsx]

## Sheet: List1
Table 3. Sr–Nd isotopic compositions, Munsell colour codes, cultural affiliations of studied samples from Přerov–Předmostí and a reference ceramic sample from the Celtic oppidum at Třísov.
Lab N	Locality	Sample	Culture/period	Age	Sample Type	Exterior colour	Interior colour	87Sr/86Sr	2S(M)	143Nd/144Nd	2S(M)	εNd0
5377	Přerov -Předmostí 6	16/2017-199-4	Linear Pottery culture (LBK)	Neolithic	Ceramics	5Y 5/1	2,5Y 6/3	0.710922	0.000012	0.512162	0.000004	-9.3
5374	Přerov Malé Předmostí 7	20/2017-296-21	Lengyel culture (Moravian Painted Ware culture)	Neolithic	Ceramics	2,5 Y 6/1	2,5 Y 4/1	0.715869	0.000015	0.512188	0.000003	-8.8
5375	Přerov Malé Předmostí 7	20/2017-296-21p	Lengyel culture (Moravian Painted Ware culture)	Neolithic	Pigment	2,5YR 6/6	2,5YR 6/6	0.713898	0.000009	0.512155	0.000003	-9.4
5381	Přerov Malé Předmostí 7	20/2017-826-2	Bell Beaker culture	Late Eneolithic	Ceramics	2,5 Y 4/1	2,5 Y 5/1	0.719074	0.000014	0.512098	0.000003	-10.5
5378	Přerov -Předmostí 6	16/2017-2318	Unetice culture	Early Bronze Age	Ceramics	2,5 Y 3/1	2,5 Y 3/1	0.715830	0.000021	0.512157	0.000005	-9.4
5380	Přerov Malé Předmostí 7	20/2017-290-1	Věteřov culture	Early Bronze Age	Ceramics	2,5Y 4/1	2,5Y 4/2	0.717081	0.000009	0.512144	0.000004	-9.6
5379	Přerov Malé Předmostí 7	20/2017-1363-53	Urnfield culture (Lusatian culture)	Late Bronze Age	Ceramics	2,5 Y 2,5/1	2,5 Y 2,5/1	0.715305	0.000009	0.512127	0.000009	-10.0
5376	Přerov Malé Předmostí	20/2017-2276-1	Silesian–Platenice culture, Hallstatt period	Early Iron Age	Ceramics	2,5 Y 4/1	2,5 Y 4/1	0.714846	0.000018	0.512167	0.000004	-9.2
5382	Přerov Malé Předmostí 7	20/2017-1471-6	Middle Hillfort period	Early Middle Ages	Ceramics	2,5Y 3/2	2,5Y 4/1	0.716409	0.000021	0.512146	0.000004	-9.6
5594	Přerov - Předmostí 8	23/2017-157-4	Linear Pottery culture (LBK)		fragments of daub			0.714380	0.000013	0.512065	0.000018	-11.2
5595	Přerov - Předmostí 7	20/2017-217-62	Lengyel culture (Moravian Painted Ware culture)		fragments of daub			0.717449	0.000036	0.512063	0.000005	-11.2
5593	Přerov - Předmostí 7	20/2017-233-9	Unetice culture		fragments of daub			0.716364	0.000018	0.512065	0.000005	-11.2
5596	NW of Přerov - Předmostí	Loess_24			Loess sample			0.719390	0.000010	0.512078	0.000005	-10.9
	Třísov	X_Tris	La Tène culture		Ceramics			0.723189	0.000013	0.511842	0.000005	-15.5
2S(M) = 2 × standard error of the mean
