# Supplementary material
Source: Research Square preprint supplement (doi:10.21203/rs.3.rs-9829345/v1)

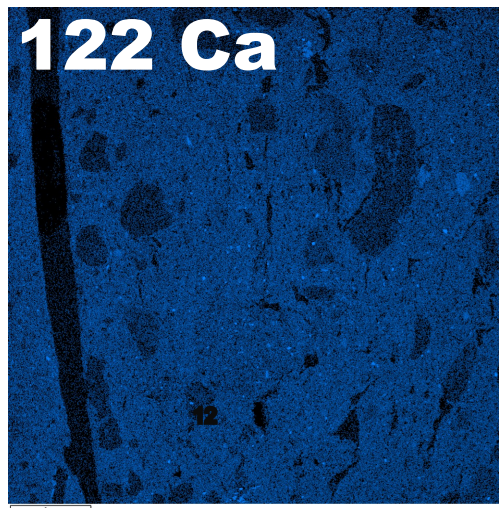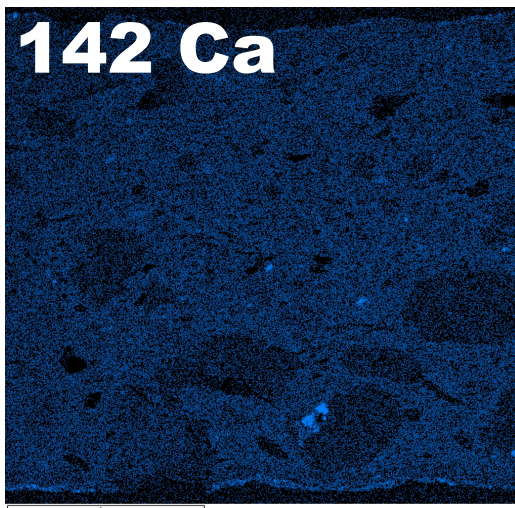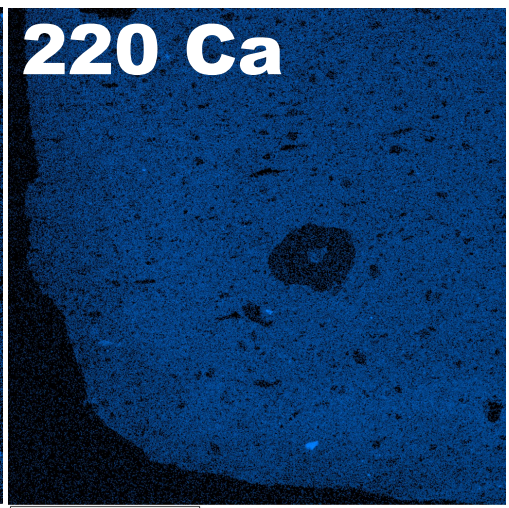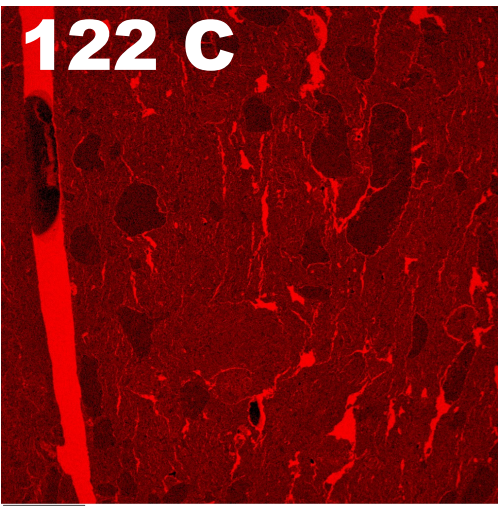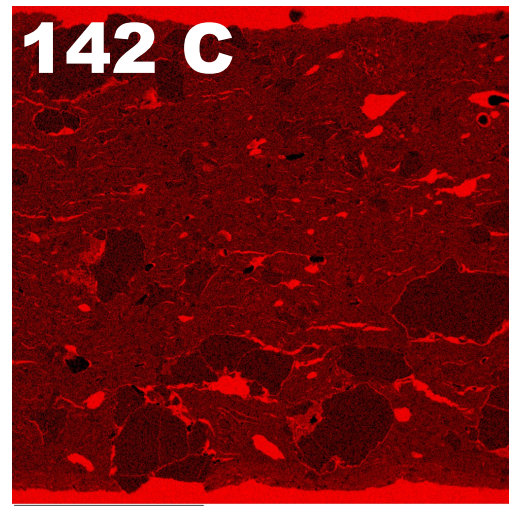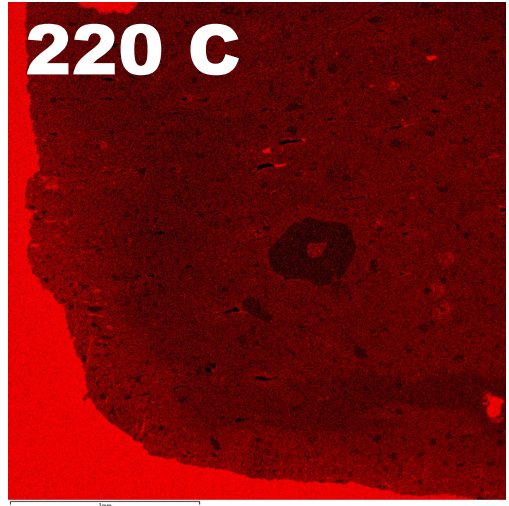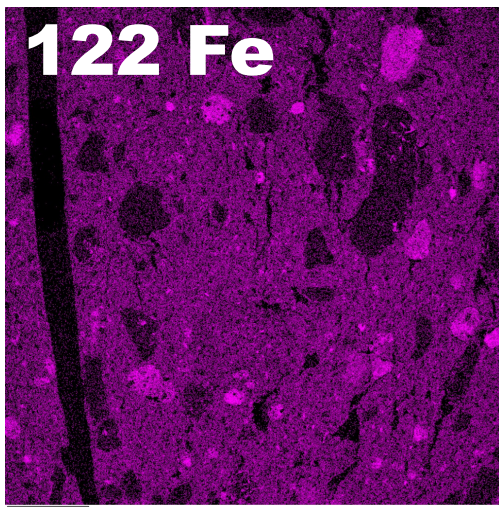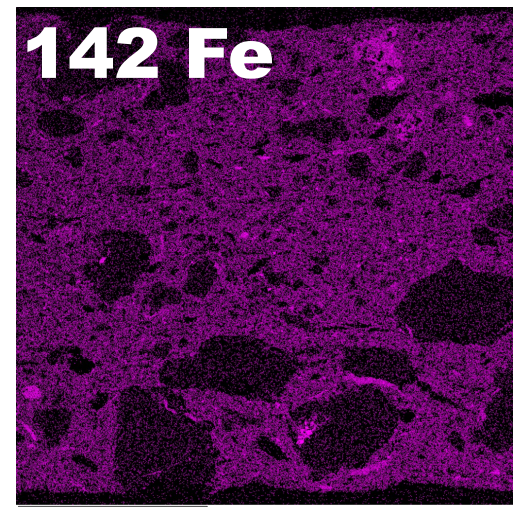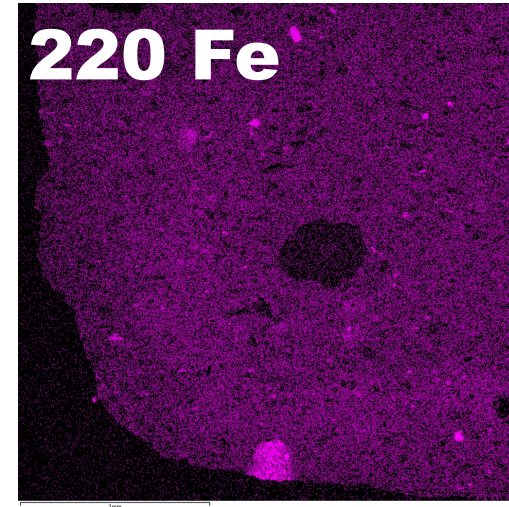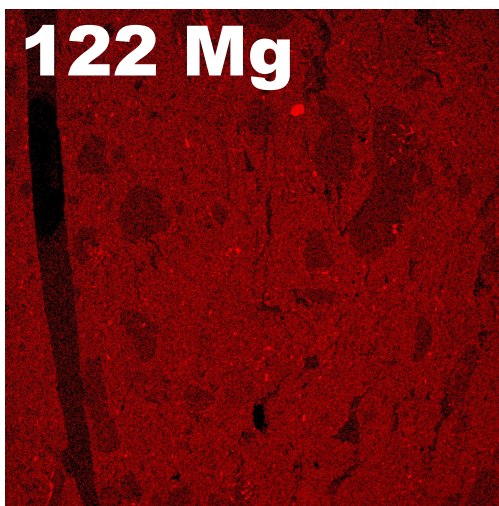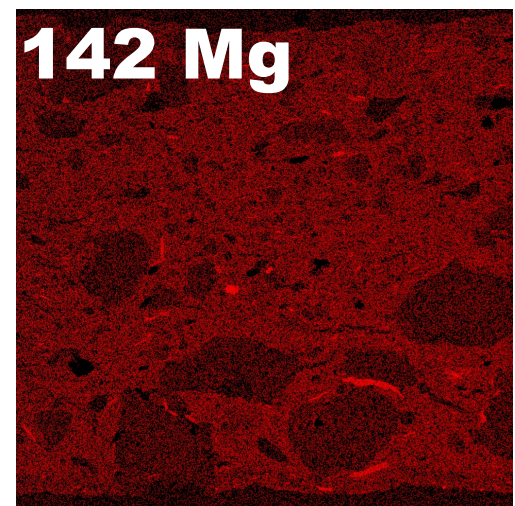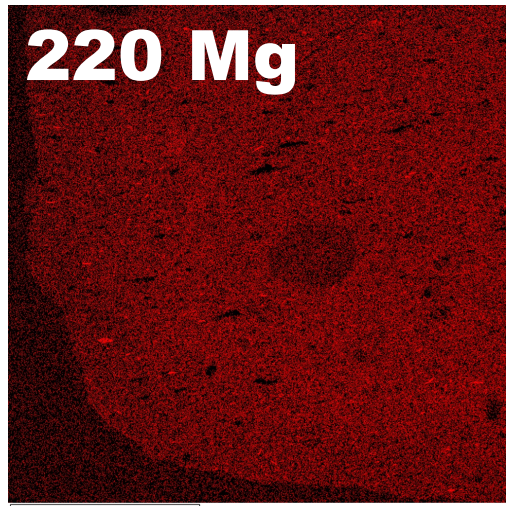

Supplement: Supplementary file 1 [file 75c23cd56bb965c0554fb872.pdf]
